1 **Optimizing Trait Predictability in Hybrid Rice Using Superior Prediction Models and Selective**

2 **Omic Datasets**

3 Shibo Wang<sup>1#</sup>, Julong Wei<sup>1,2#</sup>, Ruidong Li<sup>1</sup>, Han Qu<sup>1</sup>, Weibo Xie<sup>1,3</sup> and Zhenyu Jia<sup>1\*</sup>

4

5 <sup>1</sup> Department of Botany & Plant Sciences, University of California (Riverside), Riverside, California,

6 United States of America

7 <sup>2</sup> College of Animal Science and Technology, Nanjing Agricultural University, Nanjing, Jiangsu, China

8 <sup>3</sup> National Key Laboratory of Crop Genetic Improvement, Huazhong Agricultural University, Wuhan,

9 Hubei, China

10

11 # These authors contributed equally

12 \* Corresponding author: [zhenyuj@ucr.edu](mailto:zhenyuj@ucr.edu)

13

14 **Running title: Optimizing Trait Predictability**

15 **Words: 6335**

16

17 **Abstract**

18 Hybrid breeding has dramatically boosted yield and its stability in rice. Genomic prediction further  
19 benefits rice breeding by increasing selection intensity and accelerating breeding cycles. With the rapid  
20 advancement of technology, other omic data, such as metabolomic data and transcriptomic data, are  
21 readily available for predicting genetic values (or breeding values) for agronomically important traits. In  
22 the current study, we searched for the best prediction strategy for four traits (yield, 1000 grain weight,  
23 number of grains per panicle and number of tillers per plant) of hybrid rice by evaluating all possible  
24 combinations of omic datasets with different prediction methods. We conclude that, in rice, the  
25 predictions using the combination of genomic and metabolomic data generally produce better results  
26 than single-omics predictions or predictions based on other combined omic data. Inclusion of  
27 transcriptomic data does not improve predictability possibly because transcriptome does not provide  
28 more information for the trait than the sum of genome and metabolome; rather, the computational  
29 complexity is substantially increased if transcriptomic data is included in the models. Best linear  
30 unbiased prediction (BLUP) appears to be the most efficient prediction method compared to the other  
31 commonly used approaches, including LASSO, SSVS, SVM-RBF, SVP-POLY and PLS. Our study has  
32 provided a guideline for selection of hybrid rice in terms of which types of omic datasets and which  
33 method should be used to achieve higher trait predictability.

34

35 **Keywords:** prediction strategy, hybrid rice, omic data, genome, transcriptome, metabolome

36

## 37 **Introduction**

38 Rice, which is enriched with complex carbohydrates, vitamins, minerals, and fiber, is the main staple  
39 food for a large segment of the world population. Heterosis, referred to the superior performance of  
40 hybrids relative to their parents, has been reported as a major contributor to the increased productivity in  
41 rice (Jones, 1926; Virmani et al., 1981). Only a small number of desirable hybrids can be selected through  
42 a large number of crosses in a traditional rice breeding program which is labor intensive and time  
43 consuming (Collard and Mackill 2008; Spindel et al. 2015). Marker-assisted selection (MAS) has been  
44 used to facilitate rice breeding (Chen et al. 2000; Chen et al. 2001; Zhou et al. 2003), leading to genetic  
45 improvement and reduced generation time. Quantitative trait loci (QTL) mapping is often used to identify  
46 DNA markers for breeding if these markers are in linkage disequilibrium (LD) with the genetic  
47 determinant of traits (Asins 2002). Genomic selection (Hayes and Goddard 2001) is a special form of  
48 MAS in which all markers on the genome are used for predicting expected breeding values (EBVs) for  
49 rice hybrids. A training set is used to build a genomic selection model which can be applied to an  
50 independent set for prediction of EBVs if this set share similar genetic architecture with the training set.  
51 Genomic selection models are often evaluated by trait predictability, a measurement of prediction  
52 accuracy that is calculated through cross validation (Riedelsheimer et al. 2012). A primary goal of  
53 genomic selection modelling is to optimize the trait predictability, which is defined as the squared  
54 correlation between the observed and the predicted phenotypic values.

55 In addition to genomic data, the rapid advancement of technology generates other types of omic  
56 datasets, such as transcriptomic data, proteomic data, and metabolomic data. An integrated analysis of  
57 these omic datasets may advance our knowledge of the underlying genetic and biochemical basis for  
58 agronomic traits. For example, the joint analysis of transcriptomic data and genomic data, called eQTL  
59 mapping, treats gene expression profiles as quantitative traits and maps these expression traits to genomic  
60 loci (Jansen and Nap 2001; Doerge 2002; Schadt et al. 2003; Bing and Hoeschele 2005; Rockman and  
61 Kruglyak 2006; Keurentjes et al. 2007; Wang et al. 2014). Likewise, metabolomic expression profiles  
62 can be also treated as quantitative traits and mapped to genomic loci, *i.e.*, mQTL mapping (Keurentjes et  
63 al. 2006; Schauer et al. 2006; Dumas et al. 2007; Gieger et al. 2008; Illig et al. 2010; Suhre et al. 2011;  
64 Wei et al. 2017). Both eQTL mapping and mQTL mapping are derivatives of QTL mapping. Genes and  
65 metabolites that are mapped to the same loci as a trait may be used to uncover the biological networks  
66 that govern the variability of the trait. Moreover, combining the additional omic datasets with genomic  
67 data in selection analysis has potential to improve trait predictability.

68 Various omic datasets have been used for prediction of the EBVs of agronomic traits. For example,  
69 transcriptomic data have been used to predict hybrid performance (Stokes et al. 2010; Fu et al. 2012),  
70 and transcriptome-based prediction in hybrid maize appeared to be more precise than genome-based  
71 prediction (Frisch et al. 2010). Similarly, genomic data and metabolomic data of two backcross  
72 populations from 359 recombinant inbred lines (RILs) were used to predict biomass of *Arabidopsis*  
73 *thaliana* (Gärtner et al. 2009), in which the predictabilities for two prediction strategies were very close,  
74 *i.e.*, 0.17 and 0.16 for genomic prediction and metabolomic prediction, respectively. A population was

75 generated by testcrossing 285 diverse Dent inbred lines from worldwide sources with two testers and  
76 used to predict the combining ability for seven biomass- and bioenergy-related traits (Riedelsheimer et  
77 al. 2012). The average predictabilities of these seven traits for genomic prediction and metabolomic  
78 prediction were 0.54 and 0.33, respectively. A three-step prediction strategy was proposed and evaluated  
79 using a wheat dataset which consists of 1,604 hybrids and their 135 parents (Zhao et al. 2015). Their  
80 results showed that for hybrids without parental line in common, hybrids sharing one parental line, and  
81 hybrids sharing both parental lines, the genome-based prediction accuracies were 0.32, 0.65 and 0.89,  
82 respectively. Note the prediction accuracy, which is a different measure from predictability, was defined  
83 as the correlation between the predicted and the observed phenotypes divided by the square root of  
84 heritability. The corresponding metabolome-based prediction accuracies were 0.15, 0.42 and 0.74,  
85 respectively.

86 With the explosion of omic data, how to appropriately use these resources to aid selection has  
87 become a heated topic. It has been indicated that inclusion of metabolomic data did not improve  
88 predictive value, but hampered the performance of genomic selection in hybrid wheat (Zhao et al. 2015).  
89 Prediction based on all available omic data (genomic, metabolomics and transcriptomic data) rarely  
90 outperformed the best single omic data prediction in hybrid rice when various prediction models were  
91 compared (Xu et al. 2016). However, selection by combining transcriptomic data with genomic data  
92 resulted in a higher prediction accuracy than genomic selection in maize if the omic data (genomic,  
93 metabolomic and transcriptomic data) were collected from parental lines at their early developmental  
94 stages (Westhues et al. 2017). The conflicting conclusions in the literature highlighted the need for further  
95 investigation on what combination of the omic datasets and what prediction model yields the best  
96 prediction for a trait. The answer to this question will benefit academic research and will also greatly  
97 reduce the operative cost for the industry which specializes in breeding and selection.

98 The goal of the study is to prove the concept that trait predictability may be optimized by using  
99 superior prediction models and selective omic datasets. For demonstration, we used an immortalized F2  
100 (IMF2) population which was created by randomly paring 210 RILs (Hua et al. 2003). Three individual  
101 omic datasets, *i.e.*, genomic dataset, transcriptomic dataset and metabolomic dataset, and all possible  
102 combinations of these omic datasets were comprehensively analyzed for trait predictability using six  
103 widely adopted prediction methods.

## 104 **Results**

### 105 Analysis of variance for predictabilities

106 We calculated 168 (4×7×6) predictabilities for 4 traits using all 7 possible combinations of omic datasets  
107 (G, M, T, G + M, G + T, M + T, and G + M + T) with 6 prediction methods (Table S1; Table S2). The  
108 predictability (168 values) was treated as the response variable, and 4 traits, 7 combinations of omics  
109 datasets and 6 methods were treated as factor variables in an ANOVA analysis to detect the differences  
110 between selection schemes with different levels of these factors. The results for the IMF2 population  
111 (Table 1) show that all main and three interaction effects are significant. Comparisons between various

112 omic data combinations with ‘method factor’ being averaged out are depicted in Figure 1. For YIELD  
113 (1<sup>st</sup> panel of Figure 1), the seven combinations are classified into three levels, *i.e.*, A (best), B and C  
114 (worst). Combining genomic data and metabolomic data (G + M) produced the best predictability, while  
115 GS (prediction solely based on genomic data) gave the worst predictability. For the other three traits  
116 (KGW, GRAIN and TILLER), only two levels were detected for the seven combinations of omic datasets,  
117 with G + M being the best for KGW and GRAIN and G + M + T being the best for TILLER. Comparisons  
118 between six prediction methods with ‘combination factor’ being averaged out are depicted in Figure 2.  
119 BLUP appears to be the optimal method across all traits. For YIELD, LASSO generated the highest  
120 predictability; however, there is no statistical difference between BLUP and LASSO.

121 **Table 1.** Analysis of variance of predictabilities for a IMF2 population using a  $7 \times 4 \times 6$  factorial design  
122 (seven combinations of omic datasets, four traits, and six prediction methods)

| Source           | d.f. | Sum of square | Mean square | F-test  | P-value |
|------------------|------|---------------|-------------|---------|---------|
| Predictor        | 6    | 0.0666        | 0.0111      | 22.69   | <0.0001 |
| Trait            | 3    | 5.1340        | 1.7113      | 3495.75 | <0.0001 |
| Method           | 5    | 0.0961        | 0.0192      | 39.25   | <0.0001 |
| Method*Predictor | 30   | 0.0389        | 0.0013      | 2.65    | 0.0002  |
| Method*Trait     | 15   | 0.0501        | 0.0033      | 6.82    | <0.0001 |
| Predictor*Trait  | 18   | 0.0551        | 0.0031      | 6.25    | <0.0001 |
| Residual         | 90   | 0.0441        | 0.0005      |         |         |

123

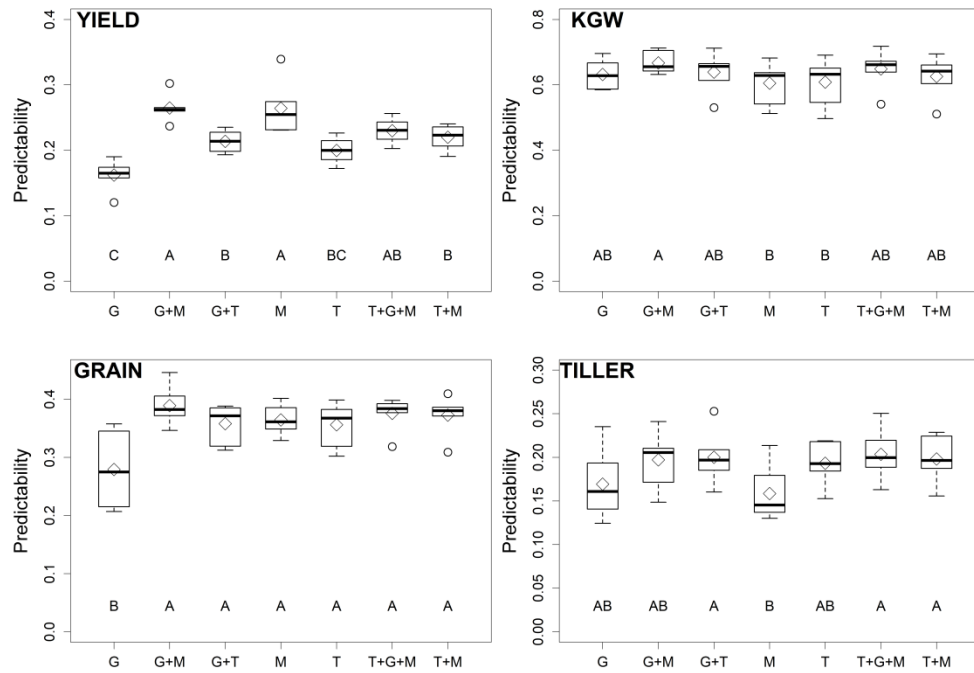

124

125 **Figure 1.** Multiple comparisons of the means of predictabilities of the four traits (YIELD, KGW, GRAIN,  
126 and TILLER) for in IMF2 population by seven combinations of omic datasets, with the differences of  
127 six prediction methods being averaged out. The capital letters 'A' through 'C' below box-plots represent  
128 the groups with significant differences in comparisons. For example, G + M (A) prediction is  
129 significantly better than G + T prediction (B), but T + G + M prediction (AB) is not significantly different  
130 from either of the other two predictions when YIELD is considered.

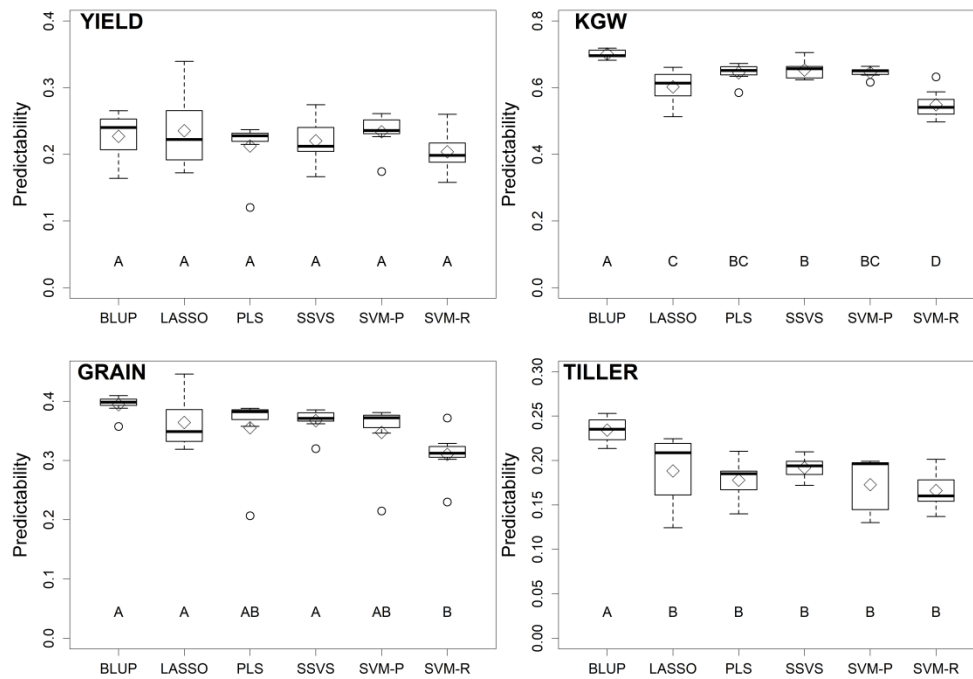

131

132 **Figure 2.** Multiple comparisons of the means of predictabilities of the four traits in the IMF2 population  
133 by six prediction methods, with the differences between seven combinations of omic datasets being  
134 averaged out.

135

136 Similar analyses have been performed on the RIL population. All main and interaction effects are  
137 significant in RILs (Table S3). Comparisons between various omic data combinations with ‘method  
138 factor’ being averaged out suggest that G + M is the best prediction scheme for YIELD, KGW and  
139 GRAIN. For TILLER, the best predictability was achieved by using genomic data G only; however, the  
140 difference between G + M and G is not significant (Figure S1). BLUP outcompeted other prediction  
141 methods again in the analysis of the RIL population (Figure S2).

142

143 Effects of different variables under different models

144 We calculated the effects of variables included in different models (G, M, T, G + M, G + T, M + T, and  
145 G + M + T) for 4 traits with the BLUP method since it appeared to be the optimal prediction method in  
146 both populations. All predictors (variables), including 1619 genomic variables, 1000 metabolites, and  
147 24,994 transcripts, had been standardized before this analysis. Comparisons of the estimated effects  
148 between various models for the IMF2 and the RIL populations are depicted in Figure 3 and Figure S3,  
149 respectively. The results suggested that estimated effects of genomic and metabolomic variables are

150 generally larger than those of the transcriptomic variables. Also, the effects of each type of omic variables  
151 under the combined model (G + M + T) are lower than those in the models where single omic data was  
152 used. In addition, the distribution of the effects of the genomic variables and metabolomic variables under  
153 the fully combined model (G + M + T) is similar with that of the G+M model.

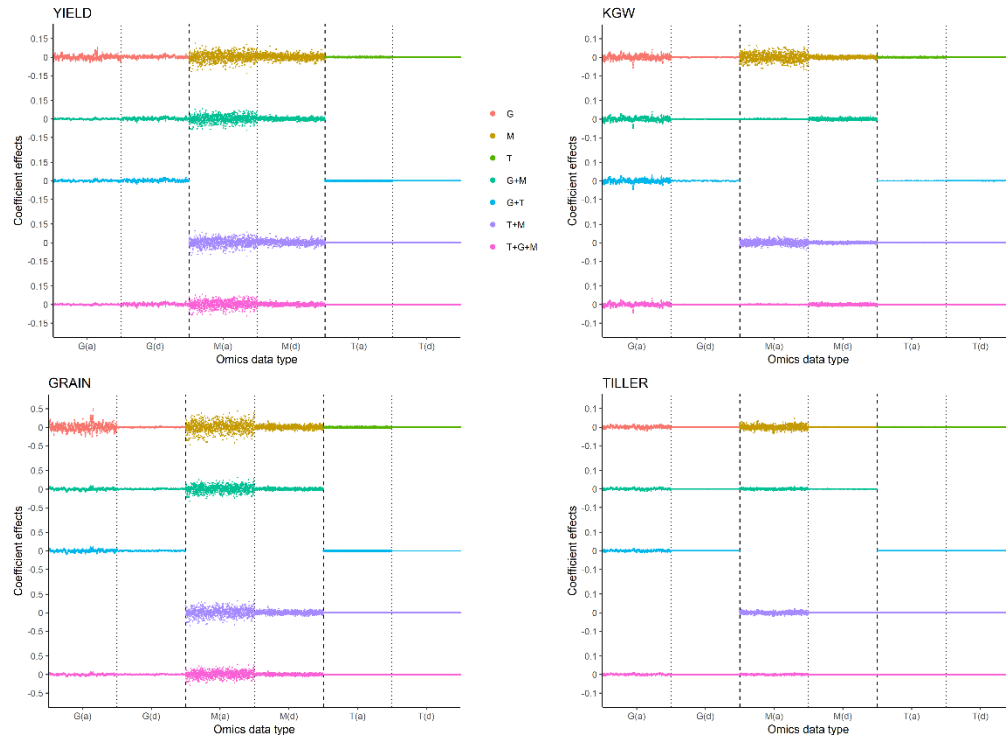

154

155 **Figure 3.** Coefficient effects with different omic datasets for the four traits in the IMF2 population. The  
156 dashed lines separate various omic-specific variables, with G, M, and T representing genomic,  
157 metabolomic, and transcriptomic variables, respectively. The dotted lines separate the additive (a) and  
158 dominance (d) variables within single omic-type variables.

159

160 Computational efficiency

161 We evaluated the computational efficiency (in terms of computing time in hours) across various omic  
162 combinations and prediction methods on a regular personal computer (Intel Core i7 CPU 7700K, 4.20  
163 GHz, Memory 16.00G). For both IMF2 population (Table S4) and RIL population (Table S5), we  
164 observed that BLUP achieved the greatest computational efficiency in average. Moreover, the computing  
165 time for BLUP increased modestly as the number of predictors increased when compared to the other  
166 methods.

167

168 Heritability vs. predictability



169 The values of overall heritability of the four traits (YIELD, KGW, GRAIN and TILLER) in two  
170 populations (IMF2 and RIL) were previously calculated (Xu et al. 2016) and used in our study. The  
171 predictabilities for these four traits in the IMF2 population (average across all methods and omics  
172 combinations) were 0.2211, 0.6187, 0.3488 and 0.1794, respectively. The correlation between the  
173 heritability and the predictability for these four traits was 0.9603 ( $P = 0.040$ ) in the IMF2 population.  
174 Similarly, the predictabilities for these four traits in the RIL population were 0.4260, 0.6807, 0.5259 and  
175 0.3828, respectively, and the correlation between heritability and predictability was 0.9440 ( $P = 0.040$ ).  
176 As expected, trait predictability generally increases with trait heritability.

177

#### 178 Overfitting

179 The squared correlation between the observed trait values and the predicted EBVs is called goodness of  
180 fit if no cross validation is applied, which is different from how predictability is defined. The measure of  
181 overfitting is the difference between the square root of goodness of fit and the square root of predictability.  
182 This is equivalent to the calculation of difference between the two correlation coefficients, one calculated  
183 between the observed trait values vs. the predicted EBVs without cross validation and the other one  
184 calculated with cross validation (Heslot et al. 2012). The levels of overfitting in the analyses of hybrids  
185 using various omic data combinations and prediction methods are listed in Figure 4, Figure 5 and Table  
186 S6. BLUP and LASSO were overall least affected by overfitting compared to the other prediction  
187 methods (Figure 5; Table S6); the difference between BLUP and LASSO is not statistically significant.  
188 Figure 4 suggested that G + M scheme is overall least affected by overfitting. Regarding the trait TN, G  
189 was visually less affected by overfitting than G + M; however, no statistical difference has been detected  
190 between the G and the G + M models.

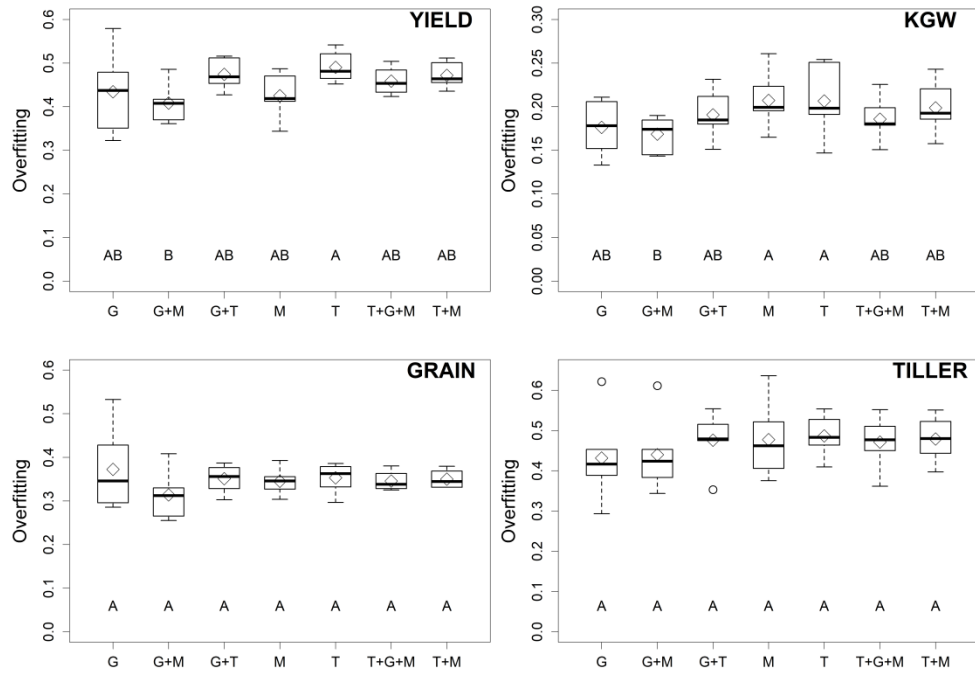

191

192 **Figure 4.** Multiple comparisons of the means of levels of overfitting for the four traits in the IMF2  
193 population by the seven combinations of omic datasets, with the differences between the six prediction  
194 methods being averaged out.

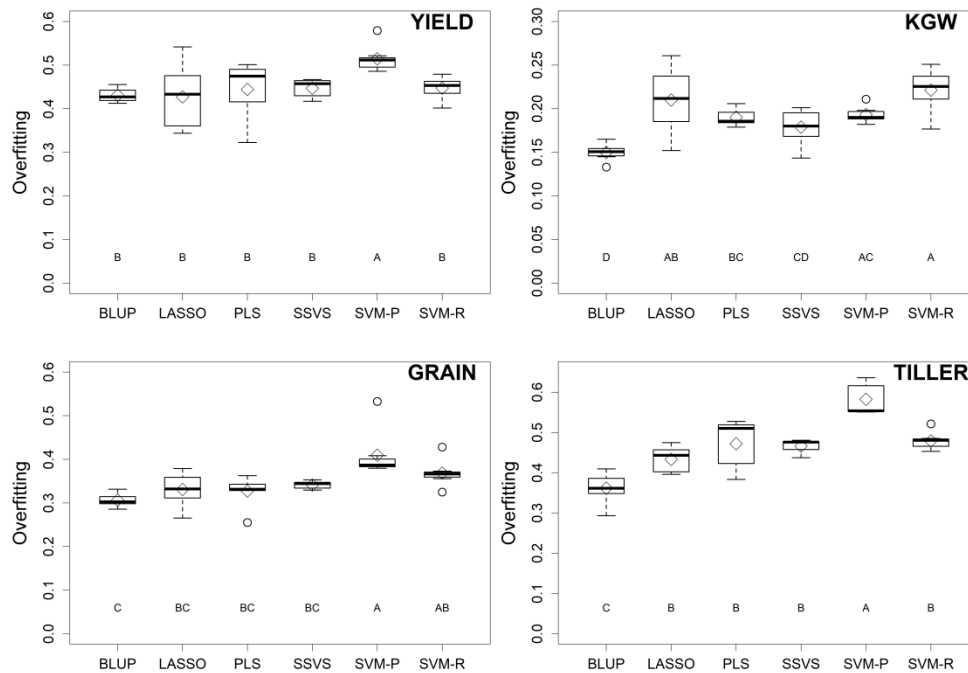

195

196 **Figure 5.** Multiple comparisons of the means of levels of overfitting for the four traits in the IMF2  
 197 population by the six prediction methods, with the differences between the seven combinations of omic  
 198 datasets being averaged out.

199

200 Selection of top crosses

201 The 278 experimental hybrids only represent a small subset of all 21945 possible crosses that could have  
 202 been produced by the 210 RILs. For each trait, we therefore used the parameters estimated from the  
 203 training samples (278 hybrids) to make predictions for all 21945 crosses. The 21945 possible crosses  
 204 were then sorted based on the phenotypic values (from largest to smallest) predicted using different omic  
 205 data combinations or different prediction methods. Example Data S1 shows the predicted phenotypic  
 206 values of all 21945 hybrids with the BLUP method using all possible combinations of the omic data. Top  
 207 10 hybrids of each sorted list are compared in two ways since we conclude the optimal strategy for  
 208 predicting hybrid rice is the BLUP method using the G + M model: (1) we first compared the top 10  
 209 hybrids selected by 6 prediction methods using G + M, and then (2) compared the top 10 hybrids selected  
 210 by BLUP when different omic data combinations were used in regression. In comparison (1), out of the  
 211 top 10 hybrids selected using BLUP, 9, 3, 6 and 7 hybrids were also selected by at least one other  
 212 prediction method for four traits (YIELD, KGW, GRAIN and TILLER), respectively (Table S7). In  
 213 comparison (2), out of the top 10 hybrids selected with G + M, 10, 8, 10 and 9 hybrids were also selected  
 214 by at least one other omic data combination for four traits, respectively (Table S8).

## 215 **Discussions**

216 This is the first study that systematically compares various trait prediction schemes using all possible  
217 combinations of omic datasets with different prediction models in order to identify the optimal strategy  
218 to achieve the best predictability. We found that the prediction based on the combination of genomic data  
219 and metabolomic data (G + M) produces the best result in the IMF2 rice population. Moreover, genomic  
220 prediction (G) or metabolomic prediction (M) is generally more effective than transcriptomic prediction  
221 (T). Inclusion of transcriptomic data to genomic prediction, metabolomic prediction, or prediction based  
222 on G + M impairs the overall model performance rather than increase predictive value. It is likely because  
223 transcriptome does not provide more information for the trait than the sum of genome and metabolome.  
224 Rather, the computational complexity is substantially increased when including transcriptomic data in  
225 the models because the number of predictor variables becomes much larger. The majority of transcripts  
226 included in the prediction models are irrelevant to the trait, leading to severe overfitting and therefore  
227 reduced predictability in cross validation. Considering YIELD, the greatest predictability was achieved  
228 by using metabolomic data (M) with LASSO, suggesting an optimal prediction strategy for prediction of  
229 yield of hybrid rice. In the RIL population, the combination of genomic data and metabolomic data (G +  
230 M) appeared to be a better option. We conclude that transcriptomic data is not necessary for selection of  
231 rice, which may greatly reduce labor and cost in industry and in future research. We also observed that  
232 the predictabilities for RILs were generally higher than those in hybrids, especially for predictions using  
233 metabolomic and transcriptomic data. This might be due to the fact that the metabolomic and  
234 transcriptomic data were directly measured for RILs but indirectly inferred, potentially with errors, for  
235 hybrids from the RIL parents. The predictabilities for hybrids may be improved if either metabolomic  
236 data or transcriptomic data or both are directly measured from the hybrids.

237 The effects of genomic and metabolomic variables under different models are generally larger than  
238 those of the transcriptomic variables. Moreover, the effects of the transcriptomic variables are generally  
239 lower than those of the genomic variables and the metabolomic variables in the G + M + T model. The  
240 sum of these evidences confirmed the reliability of using G + M model in hybrid rice selection. We also  
241 noticed that the effects of genomic variables and metabolomic variables in the G + M model were both  
242 smaller than their counterparts in the G model or M model where single omic datatype was analyzed.  
243 This result indicated that genomic data and metabolomic data provide very similar information for  
244 prediction of traits, and, therefore, when included in the same model (G + M), their effects were  
245 compromised compared to the single-omic-data models (G or M). However, the increased predictability  
246 in G + M model compared with the single-omic-data models (G or M) justified the use of the combination  
247 of genomic data and metabolomic data in hybrid rice selection. In addition, the effects of the genomic  
248 and metabolomic variables under the G + M + T model are very similar to that of the G + M model,  
249 which supported our argument that transcriptomic data is not necessary in rice selection when genomic  
250 and metabolomic data are available.

251 BLUP appeared to be a robust prediction method since the variation of the BLUP predictabilities of  
252 various omic data combination is small compared to those for the other prediction methods. Note that

253 the computing time of BLUP depends on the number of kinship matrix rather than the number of variables  
254 used for calculation of the kinship matrices. Whereas, the computing time of the other five prediction  
255 methods substantially increases with the number of variables in the models. The number of kinship  
256 matrices (covariance structures) used in BLUP for the hybrid population is twice as many as that for the  
257 RIL population; nevertheless, this does not significantly increase the total computational time. The much  
258 higher trait predictabilities achieved by the BLUP method made this method more desirable than other  
259 methods.

260 Among the six prediction methods, SVM-POLY has the greatest goodness of fit (Table S9); however,  
261 the predictability of SVM-POLY is unfavorable. This suggests that goodness of fit is not suitable for  
262 evaluating prediction models and the potential overfitting may undermine the predictive value. Rather,  
263 the predictability, which is equivalent to the square of the difference between the square root of goodness  
264 of fit and the level of overfitting, can objectively reflect the applicability of the models when they are  
265 applied to independent datasets rather than training set. In our rice study, BLUP appeared to have the  
266 highest predictabilities and lowest levels of overfitting in hybrids (Table S1; Table S9; Figure 5),  
267 indicating that BLUP is more efficient in capturing signal from noise than the other prediction methods.

268 We also examined the prediction performance for four traits based on the data in years 1998 and  
269 1999, respectively, using the BLUP method with various combinations of omic datasets. It seemed that  
270 the predictabilities for individual years were lower than that can be achieved with the combined data  
271 (averaged trait values across years) (Figure S4), indicating possible environmental variability in different  
272 years. Inclusion of environmental factor and its interaction with omic datasets may produce better trait  
273 predictabilities than simply averaging the trait values across years.

274 The best individuals, for example top 10 in a population, predicted by each method are often  
275 compared to see how many are in common such that the reliability of the method of interest can be  
276 evaluated. Considering G + M, an average of 6.3 top hybrids (out of top 10) selected by the BLUP were  
277 also selected by at least one of other five methods. In addition, an average of 9.5 top hybrids (out of top  
278 10) selected with G + M model were also selected by at least one other omic data combinations when the  
279 BLUP was applied. These results further confirmed the reliability of our selection model using the BLUP  
280 method with the G + M combination.

281 For YIELD, the predictabilities for BLUP, SSVS and SVM-POLY were close to each other. Among  
282 the top 10 hybrids selected by the BLUP, 7 were selected by SSVS and 6 were selected by SVM-POLY.  
283 It appeared that methods with similar predictabilities tend to select more common top individuals. For  
284 KGW, the predictability for BLUP was significantly higher than other methods; thus, less common top  
285 hybrids are expected between BLUP and other methods. Indeed, only 3 out of the top 10 hybrids selected  
286 by BLUP were also selected by at least one other method. For GRAIN, 6 out of the top 10 hybrids  
287 selected by BLUP were also selected by at least one other method. For TILLER, BLUP achieved the  
288 highest predictability. The method with the second highest predictability was PLS which shared 4  
289 common best hybrids with BLUP, and this number was larger than the number of common top hybrids  
290 shared by BLUP and other methods. The G + M model, of which the predictability was higher than that

291 of G model and M model, shared an average of 6.3 top hybrids with G model only and another average  
292 of 6.3 top hybrids with M model only, and with about 4 common hybrids selected by all three models (G  
293 + M, G and M). The results indicated that genomic data and metabolomic data contribute overlapping  
294 and complementary information on traits and the model utilizing both data, *e.g.*, the G + M model,  
295 benefits trait prediction most.

296 The current study has provided a guideline for rice selection in terms of what types of omic datasets  
297 and what prediction model should be used to achieve the greatest predictability. The answer may vary  
298 when different traits are considered. For other types of crops, such as maize and wheat, similar studies  
299 may be conducted to develop a selection guideline for industry practice or scientific research.

300

## 301 **Methods**

### 302 Rice data

303 Shanyou 63, an elite hybrid that has been widely cultivated in the last three decades in China, was derived  
304 from the cross between Zhenshan 97 and Minghui 63. A total of 210 RILs were derived by single-seed  
305 descent from this hybrid. An “immortalized F2” (IMF2) population was derived from randomly crossing  
306 these 210 RILs (Hua et al. 2002; Hua et al. 2003). Field data of four traits were considered, including  
307 yield (YIELD), 1000 grain weight (KGW), number of grains per panicle (GRAIN) and number of tillers  
308 per plant (TILLER). For the RIL population, each trait was measured from four replicated experiments  
309 (1997 and 1998 from one location, 1998 and 1999 from another location). In each replicated experiment,  
310 eight plants were sampled from each line and the average trait value was treated as the phenotypic value  
311 for this line in this experiment (Xing et al. 2002; Yu et al. 2011). For the IMF2 population, eight plants  
312 from each random cross were sampled and the average trait value was used as the phenotypic value for  
313 the F2 progeny of that cross. Trait values for each cross were measured twice in two consecutive years  
314 (1998 and 1999).

315 Three omic datasets, *i.e.*, genomic dataset, transcriptomic dataset, and metabolomic dataset, were  
316 only collected from the 210 RILs. Xie et al. (2010) and Yu et al. (2011) derived an ultra-high-density  
317 linkage map for these RILs, yielding genotype data represented by 1619 genetic bins. For each RIL, a  
318 genetic bin takes genotype value of 1 if the DNA in this bin is from Zhenshan 97, and 0 from Minghui  
319 63. The transcriptomic data consisted of 24,994 gene expression traits measured in tissues sampled from  
320 flag leaves of the 210 RILs in 2008 (Wang et al. 2014). RNAs were extracted from two biological  
321 replicates of each line, and then mixed in a 1:1 ratio for expression profiling by microarrays. Robust  
322 multi-array average (RMA) analysis was used for background correction and normalization. The  
323 metabolomic data for the 210 RILs consisted of 683 metabolites measured from flag leaves and 317  
324 metabolites measured from germinated seeds (Gong et al. 2013). Two biological replicates were sampled  
325 for flag leaves in 2009, while for germinated seeds one biological replicate was sampled in 2009 and the  
326 second biological replicate was sampled in 2010. Metabolomic data in both tissues were log2-

327 transformed for statistical analysis to meet with the normality assumption. The average of two replicate  
328 measurements for a metabolite was used for analysis.

329 The genotype of an IMF2 hybrid was deduced from the genotypes of two crossing parents. Let  $\pi_j^m$   
330 and  $\pi_j^f$  be  $p \times 1$  vectors of the genotypes (1 for Zhenshan 97 and 0 for Minghui 63) for male and  
331 female RIL parents, respectively, where  $m = 1619$ . We define additive genotype of the IMF2 individual  
332 as

$$333 \quad z_j = \pi_j^m + \pi_j^f \quad (1)$$

334 and dominance genotype as

335

$$336 \quad w_j = \left| \pi_j^m - \pi_j^f \right| \quad (2)$$

337 with  $j = 1, \dots, q$ , where  $q = 278$ . Therefore, the additive genotypes for the IMF2 population is defined as

$$338 \quad Z = \{z_1, \dots, z_q\}^T \quad (3)$$

339 and the dominance genotypes for the IMF2 population is defined as

$$340 \quad W = \{w_1, \dots, w_q\}^T \quad (4)$$

341 For the IMF2 population,

$$342 \quad X = \{Z||W\} \quad (5)$$

343 is a  $q \times 2p$  genotype matrix. Likewise, the metabolomic and transcriptomic data for the IMF2 population  
344 were not directly measured; rather, they were calculated from two crossing parents of each IMF2 hybrid  
345 in a similar way, with  $\pi_j^m$  and  $\pi_j^f$  representing metabolomic or transcriptomic measurements for the  
346 two RIL patents.

347

348 Prediction methods

349 Six statistical methods were used for prediction: (i) LASSO developed by (Tibshirani 1996) and  
350 implemented by GlmNet R program (Friedman et al. 2010); (ii) Henderson's BLUP implemented in the  
351 R program written by (Xu et al. 2016); (iii) SSVS (also called Bayes B) developed by (George and  
352 McCulloch 1993); (iv) support vector machine using the radial basis function (SVM-RBF) implemented

353 in the R package kernlab (Karatzoglou et al. 2004); (v) support vector machine using the polynomial  
354 kernel function (SVP-POLY) implemented in the R package kernlab (Karatzoglou et al. 2004); and (vi)  
355 partial least squares (PLS) implemented in the R package pls (Wehrens and Mevik 2007).

356 For the linear methods (LASSO, BLUP, SSVS and PLS), the single-omic-data regression is

$$357 \quad y = X\beta + \varepsilon \quad (6)$$

358 where  $y$  is the trait values, predictor variables  $X$  may be one of  $X_{SNP}$ ,  $X_{MET}$  and  $X_{EXP}$ , where  $SNP$ ,  $MET$   
359 and  $EXP$  indicate the three omic datatypes,  $\beta$  is the vector of regression coefficients, and  $\varepsilon$  is the  
360 random error which is normally distributed with  $N(0, \sigma^2)$ . The fully combined-omic-data regression  
361 becomes

$$362 \quad y = X_{SNP}\beta_{SNP} + X_{MET}\beta_{MET} + X_{EXP}\beta_{EXP} + \varepsilon \quad (7)$$

363 whereas other omic-data combined models have reduced format. Note in the BLUP method, more than  
364 one kinship matrix is needed to handle the mutually independent omic datasets. For IMF2 population  
365 with fully combined-omic-data regression, six kinships matrices were included in the model, with one  
366 for the additive effects and the other one for the dominance effects for each omic datatype.

367 Kernel methods are a class of algorithms for pattern recognition in machine learning. The most  
368 commonly used kernel methods include support vector machine (SVM) in which various kernel functions  
369 may be used for describe the relationship between dependent variable  $y$  and explanatory variable  $X$ , i.e.,

$$370 \quad y = f(X | \beta) + \varepsilon \quad (8)$$

371 Where

$$372 \quad f(X | \beta) = \sum_{j=1}^n \beta_j K_h(X, X_j) \quad (9)$$

373 and  $K_h(X, X_j)$  is a kernel selected. In this study, we chose the Gaussian kernel (SVM-RBF) and the  
374 polynomial kernel (SVM-POLY) for implementation of SVM functions.

375 Cross-validation

376 In this study, a 10-fold cross-validation was used to evaluate the predictability of each prediction method  
377 and combination of omic datasets. The trait predictability is defined as the squared correlation between  
378 the observed trait values and the predicted EBVs in cross-validation environment. The predictability  
379 calculated for a sample depends on how the sample is partitioned into different subsets for cross-  
380 validation. Therefore, 100 repeated cross-validations were performed for each analysis by randomly  
381 partitioning data in different ways and the average of the 100 predictabilities from the 100 repeated cross-  
382 validations was used for the study.



383

- 384 Asins M. 2002. Present and future of quantitative trait locus analysis in plant breeding. *Plant breeding*  
385 **121**: 281-291.
- 386 Bing N, Hoeschele I. 2005. Genetical genomics analysis of a yeast segregant population for  
387 transcription network inference. *Genetics* **170**: 533-542.
- 388 Chen S, Lin X, Xu C, Zhang Q. 2000. Improvement of bacterial blight resistance of Minghui 63', an elite  
389 restorer line of hybrid rice, by molecular marker-assisted selection.
- 390 Chen S, Xu C, Lin X, Zhang Q. 2001. Improving bacterial blight resistance of '6078', an elite restorer  
391 line of hybrid rice, by molecular marker - assisted selection. *Plant Breeding* **120**: 133-137.
- 392 Collard BC, Mackill DJ. 2008. Marker-assisted selection: an approach for precision plant breeding in  
393 the twenty-first century. *Philosophical Transactions of the Royal Society of London B:*  
394 *Biological Sciences* **363**: 557-572.
- 395 Doerge RW. 2002. Mapping and analysis of quantitative trait loci in experimental populations. *Nature*  
396 *Reviews Genetics* **3**: 43-52.
- 397 Dumas M-E, Wilder SP, Bihoreau M-T, Barton RH, Fearnside JF, Argoud K, D'Amato L, Wallis RH,  
398 Blancher C, Keun HC. 2007. Direct quantitative trait locus mapping of mammalian metabolic  
399 phenotypes in diabetic and normoglycemic rat models. *Nature genetics* **39**.
- 400 Friedman J, Hastie T, Tibshirani R. 2010. Regularization paths for generalized linear models via  
401 coordinate descent. *Journal of statistical software* **33**: 1.
- 402 Frisch M, Thiemann A, Fu J, Schrag TA, Scholten S, Melchinger AE. 2010. Transcriptome-based distance  
403 measures for grouping of germplasm and prediction of hybrid performance in maize.  
404 *Theoretical and applied genetics* **120**: 441-450.
- 405 Fu J, Falke KC, Thiemann A, Schrag TA, Melchinger AE, Scholten S, Frisch M. 2012. Partial least squares  
406 regression, support vector machine regression, and transcriptome-based distances for  
407 prediction of maize hybrid performance with gene expression data. *Theoretical and applied*  
408 *genetics* **124**: 825-833.
- 409 Gärtner T, Steinfath M, Andorf S, Lisec J, Meyer RC, Altmann T, Willmitzer L, Selbig J. 2009. Improved  
410 heterosis prediction by combining information on DNA-and metabolic markers. *PLoS One* **4**:  
411 e5220.
- 412 George EI, McCulloch RE. 1993. Variable selection via Gibbs sampling. *Journal of the American*  
413 *Statistical Association* **88**: 881-889.
- 414 Gieger C, Geistlinger L, Altmaier E, De Angelis MH, Kronenberg F, Meitinger T, Mewes H-W, Wichmann  
415 H-E, Weinberger KM, Adamski J. 2008. Genetics meets metabolomics: a genome-wide  
416 association study of metabolite profiles in human serum. *PLoS genetics* **4**: e1000282.
- 417 Gong L, Chen W, Gao Y, Liu X, Zhang H, Xu C, Yu S, Zhang Q, Luo J. 2013. Genetic analysis of the  
418 metabolome exemplified using a rice population. *Proceedings of the National Academy of*  
419 *Sciences* **110**: 20320-20325.
- 420 Hayes B, Goddard M. 2001. Prediction of total genetic value using genome-wide dense marker maps.  
421 *Genetics* **157**: 1819-1829.
- 422 Heslot N, Yang H-P, Sorrells ME, Jannink J-L. 2012. Genomic selection in plant breeding: a comparison  
423 of models. *Crop Science* **52**: 146-160.
- 424 Hua J, Xing Y, Wu W, Xu C, Sun X, Yu S, Zhang Q. 2003. Single-locus heterotic effects and dominance by  
425 dominance interactions can adequately explain the genetic basis of heterosis in an elite rice

- 426 hybrid. *Proceedings of the National Academy of Sciences* **100**: 2574-2579.
- 427 Hua J, Xing Y, Xu C, Sun X, Yu S, Zhang Q. 2002. Genetic dissection of an elite rice hybrid revealed that  
428 heterozygotes are not always advantageous for performance. *Genetics* **162**: 1885-1895.
- 429 Illig T, Gieger C, Zhai G, Römisch-Margl W, Wang-Sattler R, Prehn C, Altmaier E, Kastenmüller G, Kato  
430 BS, Mewes H-W. 2010. A genome-wide perspective of genetic variation in human  
431 metabolism. *Nature genetics* **42**: 137-141.
- 432 Jansen RC, Nap J-P. 2001. Genetical genomics: the added value from segregation. *TRENDS in Genetics*  
433 **17**: 388-391.
- 434 Karatzoglou A, Smola A, Hornik K, Zeileis A. 2004. kernlab-an S4 package for kernel methods in R.  
435 *Journal of statistical software* **11**: 1-20.
- 436 Keurentjes JJ, Fu J, De Vos CR, Lommen A, Hall RD, Bino RJ, van der Plas LH, Jansen RC, Vreugdenhil D,  
437 Koornneef M. 2006. The genetics of plant metabolism. *Nature genetics* **38**: 842-849.
- 438 Keurentjes JJ, Fu J, Terpstra IR, Garcia JM, van den Ackerveken G, Snoek LB, Peeters AJ, Vreugdenhil D,  
439 Koornneef M, Jansen RC. 2007. Regulatory network construction in Arabidopsis by using  
440 genome-wide gene expression quantitative trait loci. *Proceedings of the National Academy of*  
441 *Sciences* **104**: 1708-1713.
- 442 Riedelsheimer C, Czedik-Eysenberg A, Grieder C, Lisek J, Technow F, Sulpice R, Altmann T, Stitt M,  
443 Willmitzer L, Melchinger AE. 2012. Genomic and metabolic prediction of complex heterotic  
444 traits in hybrid maize. *Nature genetics* **44**: 217-220.
- 445 Rockman MV, Kruglyak L. 2006. Genetics of global gene expression. *Nature Reviews Genetics* **7**: 862-  
446 872.
- 447 Schadt EE, Monks SA, Drake TA, Lusk AJ, Che N, Colinayo V, Ruff TG, Milligan SB, Lamb JR, Cavet G.  
448 2003. Genetics of gene expression surveyed in maize, mouse and man. *Nature* **422**: 297-302.
- 449 Schauer N, Semel Y, Roessner U, Gur A, Balbo I, Carrari F, Pleban T, Perez-Melis A, Bruedigam C, Kopka  
450 J. 2006. Comprehensive metabolic profiling and phenotyping of interspecific introgression  
451 lines for tomato improvement. *Nature biotechnology* **24**: 447-454.
- 452 Spindel J, Begum H, Akdemir D, Virk P, Collard B, Redoña E, Atlin G, Jannink J-L, McCouch SR. 2015.  
453 Genomic selection and association mapping in rice (*Oryza sativa*): effect of trait genetic  
454 architecture, training population composition, marker number and statistical model on  
455 accuracy of rice genomic selection in elite, tropical rice breeding lines. *PLoS genetics* **11**:  
456 e1004982.
- 457 Stokes D, Fraser F, Morgan C, O'Neill CM, Dreos R, Magusin A, Szalma S, Bancroft I. 2010. An  
458 association transcriptomics approach to the prediction of hybrid performance. *Molecular*  
459 *breeding* **26**: 91-106.
- 460 Suhre K, Wallaschofski H, Raffler J, Friedrich N, Haring R, Michael K, Wasner C, Krebs A, Kronenberg F,  
461 Chang D. 2011. A genome-wide association study of metabolic traits in human urine. *Nature*  
462 *genetics* **43**: 565-569.
- 463 Tibshirani R. 1996. Regression shrinkage and selection via the lasso. *Journal of the Royal Statistical*  
464 *Society Series B (Methodological)*: 267-288.
- 465 Wang J, Yu H, Weng X, Xie W, Xu C, Li X, Xiao J, Zhang Q. 2014. An expression quantitative trait loci-  
466 guided co-expression analysis for constructing regulatory network using a rice recombinant  
467 inbred line population. *Journal of experimental botany* **65**: 1069-1079.
- 468 Wehrens R, Mevik B-H. 2007. The pls package: principal component and partial least squares

- 469 regression in R.
- 470 Wei J, Wang A, Li R, Qu H, Jia Z. 2017. Metabolome-wide association studies for agronomic traits of  
471 rice. *Heredity*: 1.
- 472 Westhues M, Schrag TA, Heuer C, Thaller G, Utz FH, Schipprack W, Thiemann A, Seifert F, Ehret A,  
473 Schlereth A. 2017. Omics-Based Hybrid Prediction In Maize. *bioRxiv*: 134668.
- 474 Xie W, Feng Q, Yu H, Huang X, Zhao Q, Xing Y, Yu S, Han B, Zhang Q. 2010. Parent-independent  
475 genotyping for constructing an ultrahigh-density linkage map based on population  
476 sequencing. *Proceedings of the National Academy of Sciences* **107**: 10578-10583.
- 477 Xing Y, Tan Y, Hua J, Sun X, Xu C, Zhang Q. 2002. Characterization of the main effects, epistatic effects  
478 and their environmental interactions of QTLs on the genetic basis of yield traits in rice.  
479 *Theoretical and applied genetics* **105**: 248-257.
- 480 Xu S, Xu Y, Gong L, Zhang Q. 2016. Metabolomic prediction of yield in hybrid rice. *The Plant Journal* **88**:  
481 219-227.
- 482 Yu H, Xie W, Wang J, Xing Y, Xu C, Li X, Xiao J, Zhang Q. 2011. Gains in QTL detection using an ultra-high  
483 density SNP map based on population sequencing relative to traditional RFLP/SSR markers.  
484 *PloS one* **6**: e17595.
- 485 Zhao Y, Li Z, Liu G, Jiang Y, Maurer HP, Würschum T, Mock H-P, Matros A, Ebmeyer E, Schachschneider  
486 R. 2015. Genome-based establishment of a high-yielding heterotic pattern for hybrid wheat  
487 breeding. *Proceedings of the National Academy of Sciences* **112**: 15624-15629.
- 488 Zhou P, Tan Y, He Y, Xu C, Zhang Q. 2003. Simultaneous improvement for four quality traits of Zhenshan  
489 97, an elite parent of hybrid rice, by molecular marker-assisted selection. *Theoretical and  
490 Applied Genetics* **106**: 326-331.
- 491
